# Supplementary material
Source: Research Square preprint supplement (doi:10.21203/rs.3.rs-8713007/v1)
Supplement: Supplementary file 1 [file 219f672c539769d4120387d5.docx]

Table 1. Comparison of Clinical Response Rates Across Treatment Regimens.

| Response Category | Monotherapy（n=25） | Doublet Therapy（n=15） | Triplet Therapy（n=6） |
| --- | --- | --- | --- |
| CR | 7(28.0%) | 5(33.3%) | 2(33.3%) |
| PR | 14(56.0%) | 2(13.3%) | 1(16.7%) |
| OR | 21(84.0%) | 7(46.7%) | 3(50.0%) |

Table 2 Temporal Changes in 24-hour Urinary Protein Excretion Across Treatment Regimens and Temporal Trajectory of Serum Albumin Recovery Following Immunosuppressive Treatment.

|  | Time Point | Monotherapy | Doublet Therapy | Triplet Therapy |
| --- | --- | --- | --- | --- |
| 24-hour Urinary Protein Excretion (g) | Baseline | 4.78±3.41 | 6.70±7.26 | 7.82±8.61 |
|  | 3M | 3.48±2.95 | 0.88±1.01 | 3.30±0.85 |
|  | 6M | 2.85±2.62 | 3.36±5.05 | 2.77±2.14 |
|  | 12M | 1.75±2.50 | 3.45±4.91 | 2.05±3.32 |
| Serum Albumin (g/L) | Baseline | 30.15±6.25 | 30.22±6.33 | 31.50±7.65 |
|  | 3M | 33.58±6.58 | 34.52±6.60 | 30.91±7.22 |
|  | 6M | 36.80±5.75 | 35.96±8.20 | 33.81±6.46 |
|  | 12M | 39.51±5.11 | 39.37±5.18 | 41.33±4.74 |

Table 3 Comparative Analysis of B-Cell Pharmacodynamics Across Treatment Regimens.

| Treatment Regiment | Averge(cells/μL) | Depletion Rate (%) | Clearance Rate (%) |
| --- | --- | --- | --- |
| Triplet Therapy | 27.3 | **71.40%** | 37.70% |
| Doublet Therapy | 21.4 | 63.60% | 32.60% |
| Monotherapy | 43.5 | 37.00% | 57.30% |

Table 4 Association Between Antibody Status, Treatment Regimen, and Clinical Response.

| Treatment Regiment | Antibody Status, Negative (titer < 2) | n | ORR |
| --- | --- | --- | --- |
| Monotherapy | Negative (titer < 2) | 4 | 75.00% |
| Monotherapy | Positive (titer ≥ 2) | 52 | 80.80% |
| Doublet Therapy | Negative (titer < 2) | 2 | 50.00% |
| Doublet Therapy | Positive (titer ≥ 2) | 30 | 46.70% |
| Triplet Therapy | Negative (titer < 2) | 1 | 100.00% |
| Triplet Therapy | Positive (titer ≥ 2) | 9 | 55.60% |

Table 5 Dynamic Changes in Estimated Glomerular Filtration Rate (eGFR) Following Treatment Initiation.

| Time Point | Monotherapy mean | Monotherapy standard deviation | Doublet Therapy mean | Doublet Therapy standard deviation | Triplet Therapy mean | Triplet Therapy standard deviation |
| --- | --- | --- | --- | --- | --- | --- |
| Baseline | 91.82 | 27.65 | 82.55 | 38.38 | 77.07 | 29.44 |
| 3M | 95.93 | 20.47 | 84.26 | 38.1 | 79.6 | 23.1 |
| 6M | 96.65 | 23.45 | 85.74 | 36.93 | 88.3 | 20.77 |
| 12M | 101.68 | 17.4 | 89.24 | 37.47 | 71.79 | 27.57 |
